# Supplementary material for: Adsorption and photo-Fenton catalytic degradation of organic dyes over crystalline LaFeO3-doped porous silica
Source: Royal Society of Chemistry journal article supplement (doi:10.1039/c8ra07073c), 2018-01-01
Supplement: c8ra07073c1.pdf [file c8ra07073c1.pdf]

## Supplementary Information

### Adsorption and Photo-Fenton Catalytic Degradation of Organic Dyes Over Crystalline LaFeO<sub>3</sub>-doped Porous Silica

Thi To Nga Phan, Aleksandar N. Nikoloski, Parisa Arabzadeh Bahri, Dan Li\*

Chemical and Metallurgical Engineering and Chemistry, School of Engineering and Information Technology, Murdoch University, Western Australia, Australia

\*Corresponding author. Telephone: +61 8 9360 2569; E-mail: L.Li@murdoch.edu.au.

**Table S1.** Kinetic parameters of pseudo-first-order and pseudo-second-order.

| Sample       | Pseudo-first-order kinetic model |                                   |        | Pseudo-second-order kinetic model             |                                   |        |
|--------------|----------------------------------|-----------------------------------|--------|-----------------------------------------------|-----------------------------------|--------|
|              | $k_1$ (min <sup>-1</sup> )       | $q_e$ (cal) (mg g <sup>-1</sup> ) | $r^2$  | $k_2$ (g mg <sup>-1</sup> min <sup>-1</sup> ) | $q_e$ (cal) (mg g <sup>-1</sup> ) | $r^2$  |
| HPS-0LFO     | 0.0751                           | 1.2349                            | 0.8161 | 0.1621                                        | 6.5530                            | 0.9998 |
| HPS-0.075LFO | 0.0823                           | 2.8912                            | 0.8620 | 0.0222                                        | 5.4436                            | 0.9877 |
| HPS-0.15LFO  | 0.0656                           | 2.0686                            | 0.9862 | 0.0354                                        | 2.1335                            | 0.9661 |
| HPS-0.3LFO   | 0.1006                           | 1.0550                            | 0.9213 | 0.0771                                        | 1.0329                            | 0.9715 |

\*Pseudo-first-order:  $\ln(q_e - q_t) = \ln q_e - k_1 t$ ; Pseudo-second-order:  $\frac{t}{q_t} = \frac{1}{k_2 q_e^2} + \frac{t}{q_e}$ ; where  $q_t$  is the amount of RhB adsorbed at a given period of time (mg g<sup>-1</sup>);  $q_e$  is the amount of RhB adsorbed at equilibrium (mg g<sup>-1</sup>);  $t$  is the adsorption time (min);  $k_1$  (min<sup>-1</sup>), and  $k_2$  (g mg<sup>-1</sup> min<sup>-1</sup>) are the adsorption rate constants of the pseudo-first-order and pseudo-second-order, respectively<sup>1,2</sup>.

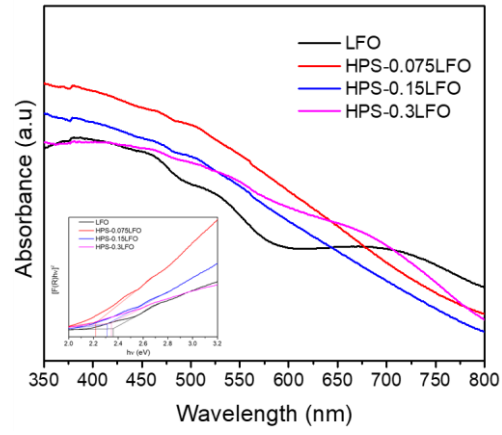

**Fig. S1.** UV-vis absorption spectra of the samples (the inset:  $[F(R)hv]^2$  versus  $h\nu$  plots).

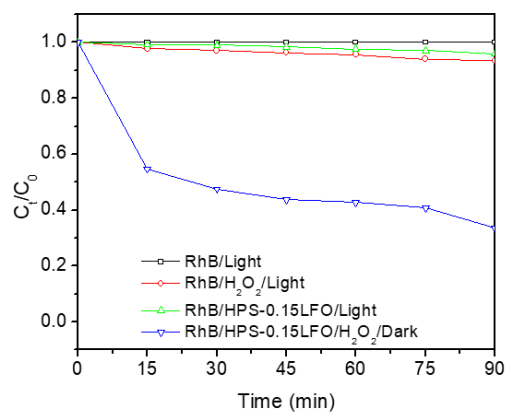

**Fig. S2.** Change of RhB concentration in different systems: RhB/Light (the solution with RhB under visible light), RhB/H<sub>2</sub>O<sub>2</sub>/Light (the solution with RhB and H<sub>2</sub>O<sub>2</sub> under visible light), RhB/HPS-0.15LFO/Light (the solution with RhB and HPS-0.15LFO under visible light) and RhB/HPS-0.15LFO/H<sub>2</sub>O<sub>2</sub>/Dark (the solution with RhB, H<sub>2</sub>O<sub>2</sub> and HPS-0.15LFO in dark).

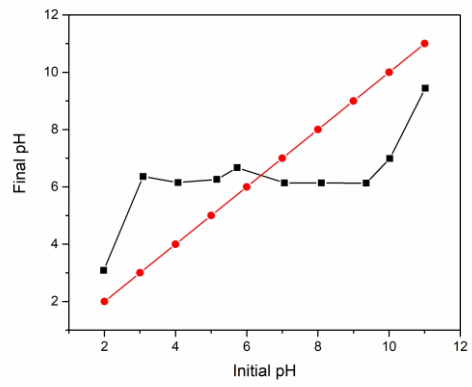

**Fig. S3.**  $\text{pH}_{\text{pzc}}$  of the HPS-0.15LFO sample using the pH drift method.

## References

1. Y.-S. Ho and G. McKay, *Process Safety and Environmental Protection*, 1998, **76**, 183-191.
2. J. Lin and L. Wang, *Frontiers of Environmental Science & Engineering*, 2009, **3**, 320-324.
